# Supplementary material
Source: PubMed Central journal article supplement (PMC2821725)

**A**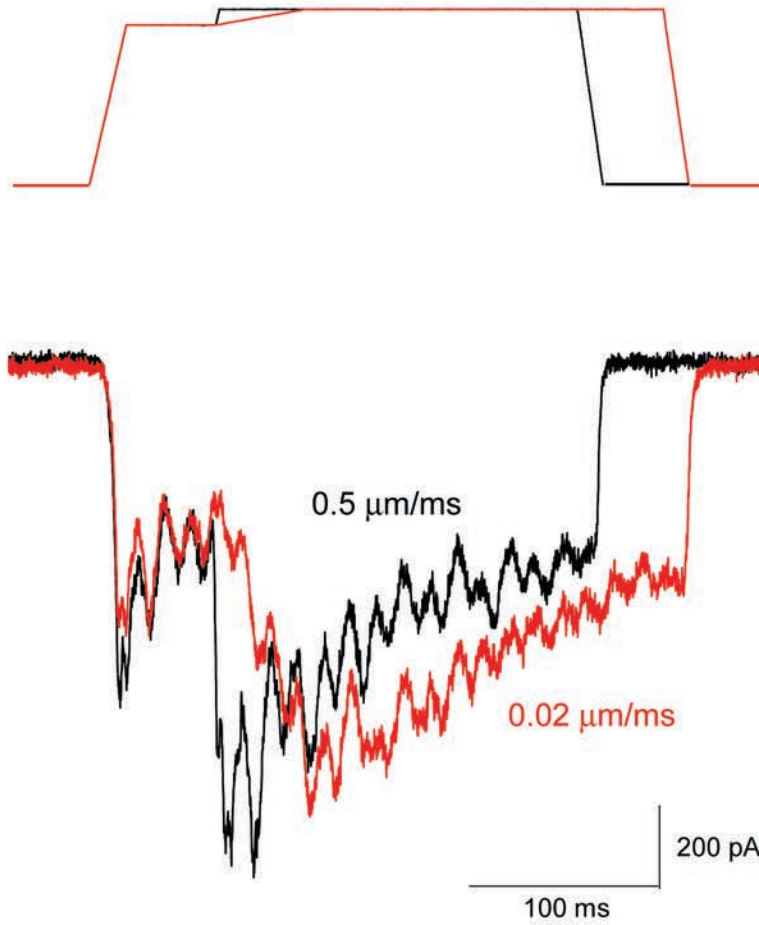**B**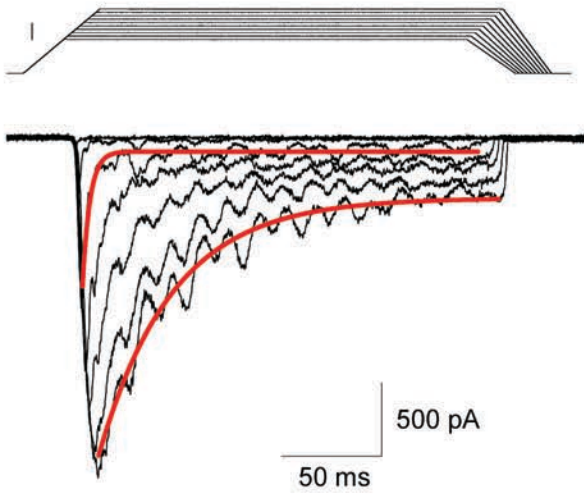**C**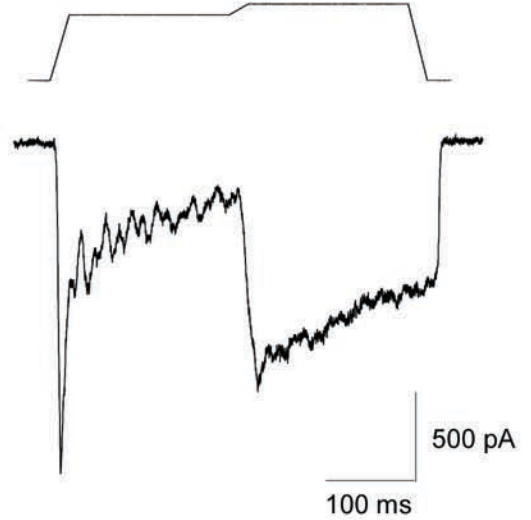**Supplementary Figure 1**

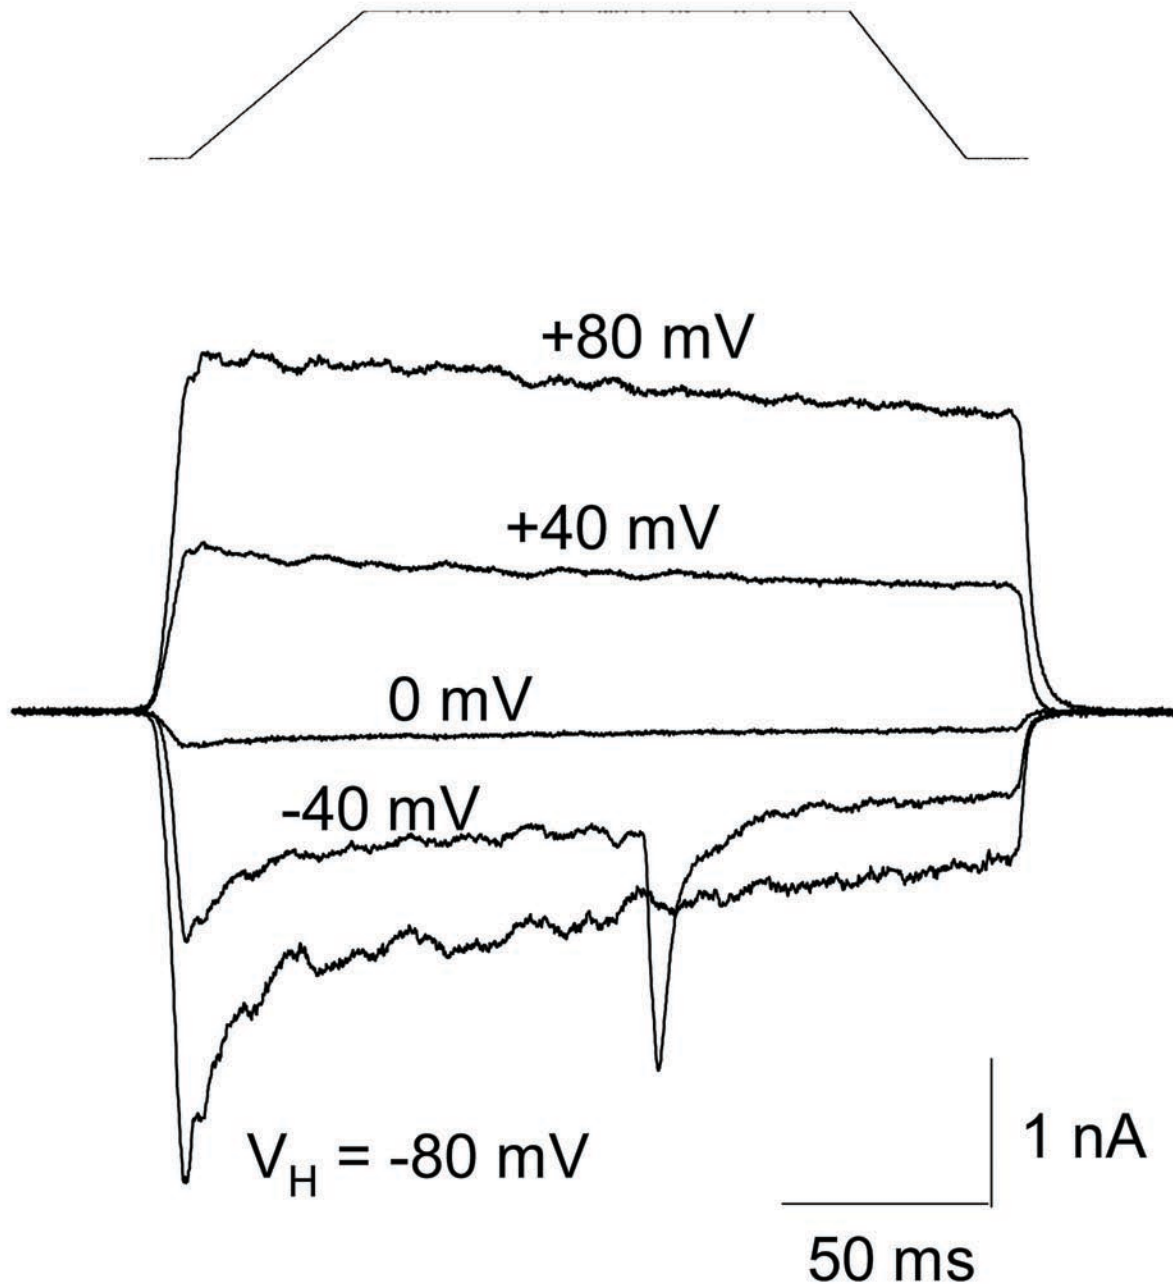

**Supplementary Figure 2**

Supplement: tjp0588-0301-SD1.pdf [file tjp0588-0301-SD1.pdf]
